# Supplementary material
Source: MDPI journal article supplement (https://www.mdpi.com/2073-4395/10/7/1018)
Supplement: s1 [file s1]

## Sheet: Acronyms and Abbreviations
List of Acronyms and Abbreviations
APTES		(3-Aminopropyl)triethoxysilane
CBAA		Carboxybetaine AcrylAmide
Cit		Citrate
DLS		Dynamic Light Scattering
DMAPS		3-dimethyl(methacryloyloxyethyl)ammonium propanesulfonate)
DOC		Dissolved Organic Carbon
EPM		Electrophoretic Mobility
EPS		Extracellular Polymeric Substance/Exopolysaccharides
FA		Fulvic Acid
HA		Humic Acid
HDTMA		hexadecyltrimethyl ammonium bromide
HS		Hydrogen Sulfide Group
HS-PC		Hydrogen Sulfide Functionalized Phosphorylcholine
MSN		Mesoporous Silica Nanoparticle
NOM		Natural Organic Matter
NP		Nanoparticle
OEGMA		Oligoethylene Glycol Methacrylate
OEGMMA		oligo(ethylene glycol) methyl methacrylate
pCBMMA		poly-Carboxybetaine Methyl-methacrylate
PDMAEMA		poly(2-(dimethylamino) ethyl methacrylate)
PC		phosphorylcholine
PEG		Polyethylene Glycol
PEI		Polyethylenimine
PMMA		Polymethyl Methacrylate
PNIPA		Poly(N-isopropyl acrylamide)
PVA		Poly Vinyl Alcohol
PVP		Pollyvinylpyrrolidone
PZC		Point of Zero Charge
QELS		Quasi-Electric Light Scattering
SBMA		Sulfobetaine Methacrylate
SBS		Sulfobetaine Siloxane
SDS		sodium dodecyl sulfate
SDBS		sodium dodecyl benzene sulfate
SEM		Scanning Electron Microscopy
TEM		Transmission Electron Microscopy
VTES		Vinyl(triethoxysilane)
ZP		Zeta Potential

## Sheet: Coatings List
List of any/all NP coatings found in the literature search. Not all are used with metal/metal-oxide NPs. Some coatings suggested to aid in NP stability without supporting data. Some are impractical for soil applications.
Amino Acids
APTES
Au NPs
Betaine
Carboxybetaine
Citrate
CTAB
Cysteine Betaine
Disulfide Zwitterions
EPS
FA
HA
HDTMA
Mixed Charge Zwitterions
HS-PC
NOM
OEGMA
poly-Arginine
pCBBA
PEG
PEI
Phycomolecules
poly-Lysine
Proline
PSBMA
PVA
PVP
SBS
SDBS
SDS
Sewage
SiO2 NP
SnO2 NP
Soil Pore Water
Trehalose
Trolox
Tween
VTES

## Sheet: Coatings Table
NP and Source Details			NP Size (Technique)		Surface Charge (mV)				Testing Conditions Where Stability was Observed
Source	Coating (Classification)	Core NP(s)	Bare Size (nm)	Coated Size (nm)	Medium	pH	Bare NP Zeta Potential	Coated NP Zeta Potential	pH	Temperature	Ionic Stability	Biological Components	Organic Matter/ Soils/Polymers	Time
Adeleye 2014 [66]	Soil Matter (NOM)	Cu, CuO, Kocite	40, 50, 50000 (SEM) 2590, 280, 1532 (DLS)	-----, 308, ---- (DLS)	0.5 mM PBS	7	-34	-25 (EPS) -45 (SRN)	4,7,11	----------	1, 10, 100 mM NaCl	5 mg-C/L EPS 5 mg/L SRN	----------	90 d
Baalousha 2013 [67]	FA (NOM)	cit-Ag	29.9 (DLS) 17 (TEM) 20.8 (Flow-Field Flow Fractionation)	----------	DI Water	7	Electrophoretic Mobility (EPM): -3.88x10^(-8) m^2/s	EPM: Reported as "Lower" in the presence of FA	~7	----------	NaCl, NaNO3, Na2SO4, CaCl2, Ca(NO3)2, CaSO4, MgCl2, MgSO4, and NaCl/CaCl2	---------	Very Soft Water, Soft Water, Sea Water	---------
Dutta 2019 [68]	HA (NOM)	ZnO	30 (Sigma-Aldrich)	25 (SEM)	----------				4, 7, 12	----------	----------	----------	----------	10 d (10 ppm HA)
	Citrate (Misc)	ZnO	30 (Sigma-Aldrich)	16 (SEM)	----------				4, 7, 12	----------	----------	----------	----------	10 d (10 ppm citrate - performed worse than HA)
Estephan 2010 [69]	SBS (Zwitterion)	Silica	16.8-17.5 (SEM)	----------	----------				7.4	Up to 37 C	Up to 3M	50% FBS	----------	15 d
Huang 2016 [70]	Cysteine Betaine (Zwitterion)	Au-Ag	40-100 (SEM/DLS)	102 (DLS)	----------				7.4	Up to 55 C	Up to 3M	Gram positive/gram negative bacteria in 1% FBS	----------	24 hr
Jin 2009 [71]	HS-PC (Zwitterion)	Ag	7.8 (TEM)	7.8 (TEM)	----------				7.4	Up to 37 C	Up to 2M	Various	----------	24 hr
Khan 2011 [72]	EPS (NOM)	Ag	~50 (DLS)	~70 (DLS)	DI Water	7	10.23	-29.32 (10 mg/L EPS) to ~ -42 (250 mg/L EPS)	~3-12	----------	Up to 1 M NaCl	----------	----------	> 72 hr
Liu 2011 [73]	HS-C10-SN4 (Zwitterion)	cit-Au	16, 50, 100 (DLS/TEM)	~17.5, 55, 105 (DLS)*	----------				1-13	37 C	Up to 2M NaCl, PBS	DMEM + 10% FBS, Lysozyme, BSA, Plasma	----------	6 mo
	HS-PEG2000 (Polymer)	cit-Au	16, 50, 100 (DLS/TEM)	~45, 80, 135 (DLS)*	----------				2-12	37 C	0.1 M NaCl, PBS	DMEM + 10% FBS	----------	4 mo
	Citrate (Misc)	Au	16, 50, 100 (DLS/TEM)	~16, 50, 100 (DLS/TEM)	----------				7.4	37 C	----------	----------	----------	72 hr
Lv 2014 [74]	HA (NOM)	CeO2	538.2 (DLS)	282.8 (5 mg/L HA, DLS) 249.1 (10 mg/L HA, DLS)	DI Water	7	-7.96	-33.58 (5 mg/L HA) -35.72 (10 mg/L HA)	7-10	----------	Up to 0.1 M NaCl	----------	Sand	----------
Ranka 2015 [75]	Random Copolymer MA/SBMA (Zwitterion)	Silica	22 (Ludox-40)	~ 180 (in water, DLS) ~ 350 (in brine, DLS)	----------				----------	Up to 90 C	Water, Seawater, Arab D Brine	Up to 120k mg/dm3 (3 types of electrolytes)	----------	> 30 d
	Block Copolymer MA/SBMA (Zwitterion)	Silica	22 (Ludox-40)	~55-65 (DLS)	----------				----------	Up to 90 C	Water, Seawater, Arab D Brine	Up to 120k mg/dm3 (3 types of electrolytes)	----------	> 30 d
Rouhana 2007 [76]	Disulfide Zwitterion (Zwitterion)	cit-Au	2.8 (QELS) 3.2 (TEM)	3.2 (QELS)	----------				----------	----------	----------	BSA, Lysozyme	PSS, PAA, PDADMAC, PAH, PVBTMAC	----------
	Citrate (Misc)	Au	N/A	2.8 (QELS) 3.4 (TEM)	----------				----------	----------	----------	BSA	PSS, PAA	----------
Tebbe 2015 [77]	Albumin/Proteins (NOM)	Au	~80 nm (TEM) +Different aspect ratios	----------	PBS, DMEM, NCS	7.5	----------	-35 (pH 12) +20 (pH 1)	2-12	----------	----------	Up to 20 mg/mL biological media (PBS, DMEM)	----------	----------
Whitley 2013 [78]	PVP (Polymer)	Ag	51.4 (DLS) 53 (TEM)	51.4 (DLS)** 53 (TEM)	DI Water	6	-24.7	-101*	----------	----------	----------	----------	Soil, Sewer Sludge (1% and 3% w/w)	----------
	Citrate (Misc)	Ag	51.4 (DLS) 53 (TEM)	84.4 (DLS)** 84 (TEM)	DI Water	6	-24.7	-24.7*	----------	----------	----------	----------	Soil, Sewer Sludge (1% and 3% w/w)	----------
Yang W. 2008 [79]	pCBAA (Zwitterion)	Au	18.5 (TEM)	58.4 (DLS)	----------				7.4	----------	20% NaCl	Up to 100% BSA, 1 mg/ml Lysozyme	----------	----------
	PEG5000 (Polymer)	Au	18.5 (TEM)	53.4 (DLS)	----------				7.4	----------	----------	----------	----------	----------
	OEGMA (Polymer)	Au	18.5 (TEM)	74.3 (DLS)	----------				7.4	----------	----------	----------	----------	----------
*Values may be reversed - a discontinuity was observed between the graphs and text

## Sheet: Other Papers Considered
Column Descriptions:		Base Element (i.e. Cu for CuO, Cu, CuSO4, etc)	Primary Coating Tested/Assessed	Classification used in Review	Testing Conditions specifically to Induce Agglomeration	Did any tests specifically target aggloeration with respect to coating?	Did they use or insinuate use for agriculture?	Other Coatings Tested	What Instrumentation was Used	Target or Perceived Application Reported	Liquid Medium Tests were Performed in	*Starting/Default Size of NPs and/or Coatings if Reported (updates in progress)	doi Link
AUTHOR	YEAR	ELEMENT	COATING	CATEGORY	CONDITIONS	AGGLOMERATION	AGRICULTURE	COMPARED TO	INSTRUMENTATION	APPLICATION	ENVIRONMENT/ TEST MEDIUM	NP SIZES	DOI:
Adeleye	2014	Cu	EPS, NOM	Organic	time (90 days dissolution, 90min DLS), pH (4,7,11),	Yes	Yes	Nano-Cu, Kocite, NOM vs EPS vs None	DLS, Zeta, Cu2+, FTIR Absorbance	Environmental Toxicity	DI H2O, NaCl	280 +/- 15 nm	https://doi.org/10.1021/es5033426
Arjunen-Vasanthe	2015	Ag	pSBMA	Zwitterion	2M NaCl	No	No		UV–vis, XRD, TEM, EDX, and DLS				https://doi.org/10.1021/acs.langmuir.5b01768
Auvinen	2016	Ti, Ce, Ag	Citrate, other	Organic	4 different solid matrices	No	Yes		pH, ZP, PCS, ICP-MS, 4wk plant growth	Wastewater Extration, Plant Translocation	Sand/Gravel/Zeolite	90.7 +/- 7.9 nm	https://doi.org/10.1007/s11356-016-7459-6
Baalousha	2013	Ag	Citrate, FA	Organic	0-150 mM monovalent Na cation, 0-3 mM divalent Ca/Mg cation background sols, Saunee River Fulvic Acid, 500sec (DLS)	Yes	Yes	FA	ZP, DLS, UV-Vis	Anti-Agglomeration		2-10, 20-100 nm	https://doi.org/10.1016/j.scitotenv.2013.02.093
Biehl	2018	Magnetic Metal-Oxide NPs	Polymer/Zwitterion	Zwitterion	N/A	No	No						https://doi.org/10.3390/polym10010091
Chowdhury	2012	Ti	NOM, Bacteria	Organic	pH 5 vs 7, mono vs divalent salt, agglomerate sizes 200-1k nm	No	No						https://doi.org/10.1021/es2034747
Dutta	2019	Zn	HA, Citrate	Organic	Treated on Seedlings in Sand Growth Study, pH (4,7.4,12)	Yes	Yes	Citrate	Uv-Vis, DLS, HRTEM, Pico Fluorescence	Plant Growth	Aqueous, Acetate/Phosphate/Glycine Buffers		https://doi.org/10.1021/acssuschemeng.9b01917
El-Naggar	2017	Zn	SiO2, APTES, VTES	Inorganic	20 Wash Cycles on Fabric	No	No		Zeta, FTIR, Bacteria Counts	Anti-Microbial Cotton Fabrics	water		https://doi.org/10.1016/j.jcis.2017.03.080
Estephan	2010	Si	SBS	Zwitterion	3M salt, 37deg C, 15 day, 50% fbs protein	Yes	No				PBS		https://doi.org/10.1021/la103095d
Huang	2016	Ag/Au	Cys-B, OEL thiol	Zwitterion/Polymer	3M NaCl, 24hr, 55deg C	Yes	No		Contact Angle, XPS, Protein Fouling, Cell Counts, Extinction Maxima (uv/vis), DLS	Hypothermia trtmnt for Cancer Cells			https://doi.org/10.1016/j.colsurfb.2016.05.004
Jin	2009	Ag	Phosphorylcholine	Zwitterion	2M, Plasma	Yes	No	Citrate, Tiopronin	TEM/UV-Vis	NP Stabilization	PBS		https://doi.org/10.1007/s11426-008-0106-4
Jokerst	2011	Several	PEG	Polymer	N/A	No	No						https://doi.org/10.2217/nnm.11.19
Khan	2011	Ag	EPS	Organic	10-250 mg/L EPS, pH 3-12, 0-1.5 M NaCl, 72hrs	Yes	Yes		DLS, FTIR, Zeta	Water Toxicity	neural water	60nm -2k nm	https://doi.org/10.1016/j.watres.2011.07.024
Konduru	2015	Se	SiO2	Inorganic	BAL and plasma media, Protein Sorption (24 hr post-instillation)	Yes	No		DLS, Zeta, LC-MS, S/TEM	Ce Toxicity for Treatments in Mice	Water, BAL, blood plasma	Respective of medium, Uncoated: (136, 1463, 2572), SiO2 Coated: (208, 460, 242)	https://doi.org/10.1186/s12989-015-0106-4
Liu	2011	Au	"Mixed Charge Zwitterions"/Charged Thiols	Zwitterion	24hr, 10% FBS, PBS Buffer, 6mo Storage	Yes	No	PEG			PBS	19nm, 50nm	https://doi.org/10.1021/la2002223
Lv	2014	Ce	HA	Organic	sol pH 7-10, up to 1M NaCl, 0, 5, 10mg/L HA	Yes	Yes		Modeling	water toxicity	water		https://doi.org/10.1007/s11270-014-2167-7
Mandal	2017	Au	Trehalose	Organic	Cells with proteins/agglomerates	No	No		FTIR, TEM, OD, GC, Fluorescence, BF/DF Microscopy, UV-Vis, Cell Uptake	Inhibit Toxic Protein Agglomeration	water, PBS	20-30 nm	https://doi.org/10.1021/acs.langmuir.7b02202
Martin-Ortigoas	2012	Si	AuNP	Inorganic	Uptake of Protein-Loaded NPs into Onions	No	Yes		BET, Zeta, TEM, SEM, EDX, Fluorescence	Protein delivery in onions	7.4 PBS	~600 nm	https://doi.org/10.1002/adfm.201200359
Olteanu	2016	Au, Si	AuNP, SiO2 NP	Inorganic	Fluorescence as a Function of Coating	No	No		DLS, HRTEM, SEM, EDX, XRD, Fluorescence	Synthesis		14-240 nm (Au), 26-96 nm (SiO2-RhoB) Core NPs with 3-116 (SiO2-RhoB), 3-38 nm (Au NP) shells, respectively	https://doi.org/10.1016/j.arabjc.2015.12.014
Ranka	2015	Si	pSBMA	Zwitterion	30+day, 3 types of Electrolyte, up to 120k mg/dm3 salt conc, 90deg C	Yes	No		SANS, DLS				https://doi.org/10.1021/acsami.5b04200
Rouhana	2019	Au	Zwitter Disulfide	Zwitterion	12 months, 3M, +/- Electrolytes, +/- Proteins	Yes	Yes	Citrate	DLS, UV-Vis, Raman	NP Stabilization	Multi		https://doi.org/10.1007/s11051-012-0835-3
Sharma	2014	Ag	Citrate, PVP, Inorganic Ag-compounds	Multi	Various	Yes	?	Various	Various/More Review	Various	Various	Various	https://doi.org/10.1016/j.cis.2013.12.002
Sun	2012	Si	PDMAEMA (co-DMAPS)	Zwitterion	0.2M NaCl, 65deg C	Yes	No		TEM, FT-IR, Cytotoxicity Assay				https://doi.org/10.1002/marc.201100876
Tebbe	2015	Au (mostly rods)	Albumin/Proteins	Organic	20 mg/ml conc, PBS, pH 2-12, Freeze Dried & Redispersed	Yes	No	CTAB	Surface Enhanced Ramen, TEM, Absorbance, UV-Vis-NIR	NP Stabilization	PBS, DMEM	80nm + different lengths/aspect ratios	https://doi.org/10.1021/acsami.5b00335
Tripathy	2011	PS Latex, CdSe/ZnS QDs	Biofilm	Organic	LB Biofilm, EPS-Sand	No	Yes		ZP, Sand Columns, DLVO	Transport		925, 33, 26, 108	https://doi.org/10.1021/es202833k
Van Hoeck	2013	Au	PEG, Other	Polymer	96 hr in OECD, Exposure to L15 media	Maybe	Yes		DLS, Cell Counts	Ecotoxicity (algae cells and fish gill cells)	OECD, L15 media	4-5 nm nominal	https://doi.org/10.3109/17435390.2011.626566
Venkatachalam	2017	Zn	Phycomolecule Ligands	Organic	0, 25, 50, 75, 100, 200 mg/L ZnO NP	No	Yes		FTIR, SEM/EDX, XRD, Plant Data	Cotton Growth			https://doi.org/10.1016/j.plaphy.2016.09.004
Whitley	2013	Ag	PVP	Polymer/Organic	6months, Exposure to DOM	?	Yes	Citrate			Field		https://doi.org/10.1016/j.envpol.2013.06.027
Xia	2019	Si	PEI	Polymer	N/A	No	No		Cellular Uptake	Cell Uptake/Translocation			https://doi.org/10.1021/nn900918w
Xiao	2013	Ag, C60, Fullerol	PVP, Citrate	Polymer/Organic	Gram Positive and Gram Negative Biofilms on Glass Beads in Columns	No	Yes		ZP, DLS, SEM, Sand Columns, DLVO, COD			102 (C60), 105 (fullerol), 27 (Cit-Ag), 40 (PVP-Ag)	https://doi.org/10.1021/es304501n
Yang	2014	Ag	HA, PVP, Cysteine	NOM/Polymer/Zwitterion	300 mM ionic strength, 200 min	Yes	Yes	Natural	DLS, ZP, Breakthrough Curves	Porous Media Transport	Ionic Solution	Just over 100 nm	https://doi.org/10.1016/j.jhazmat.2013.11.025
Yang, K.	2009	Zn,Ti,Al,Si	HA	Organic		No	Yes		FTIR, Zeta, BET	NP Adsorption	water	18.5 (bare), 53.4 (PEG), 74.3 (OEGMA), 58.4 (small pCBAA), 105.9 (large pCBAA)	https://doi.org/10.1021/la803701b
Yang, W.	2009	Au	pCBAA	Zwitterion	80 hr, 1 mg/ml lysozime, 20% NaCl, 10% and 100% BSA	Yes	No	PEG, OEGMA	DLS, plasmon resonance, TEM, UV/Vis	Delivery and Diagnostics	water, lysozime, NaCl, BSA		https://doi.org/10.1016/j.biomaterials.2009.06.036
